# Supplementary material for: Influence of Tea Consumption on the Development of Second Esophageal Neoplasm in Patients with Head and Neck Cancer
Source: PubMed Central journal article supplement (PMC6468666; doi:10.3390/cancers11030387), 2019-03-19
Supplement: cancers-11-00387-s001.pdf [file cancers-11-00387-s001.pdf]

# Supplementary Materials: Influence of Tea Consumption on the Development of Second Esophageal Neoplasm in Patients with Head and Neck Cancer

Yao-Kuang Wang, Wei-Chung Chen, Ying-Ho Lai, Yi-Hsun Chen, Ming-Tsang Wu, Chie-Tong Kuo, Yen-Yun Wang, Shyng-Shiou F. Yuan, Yu-Peng Liu and I-Chen Wu

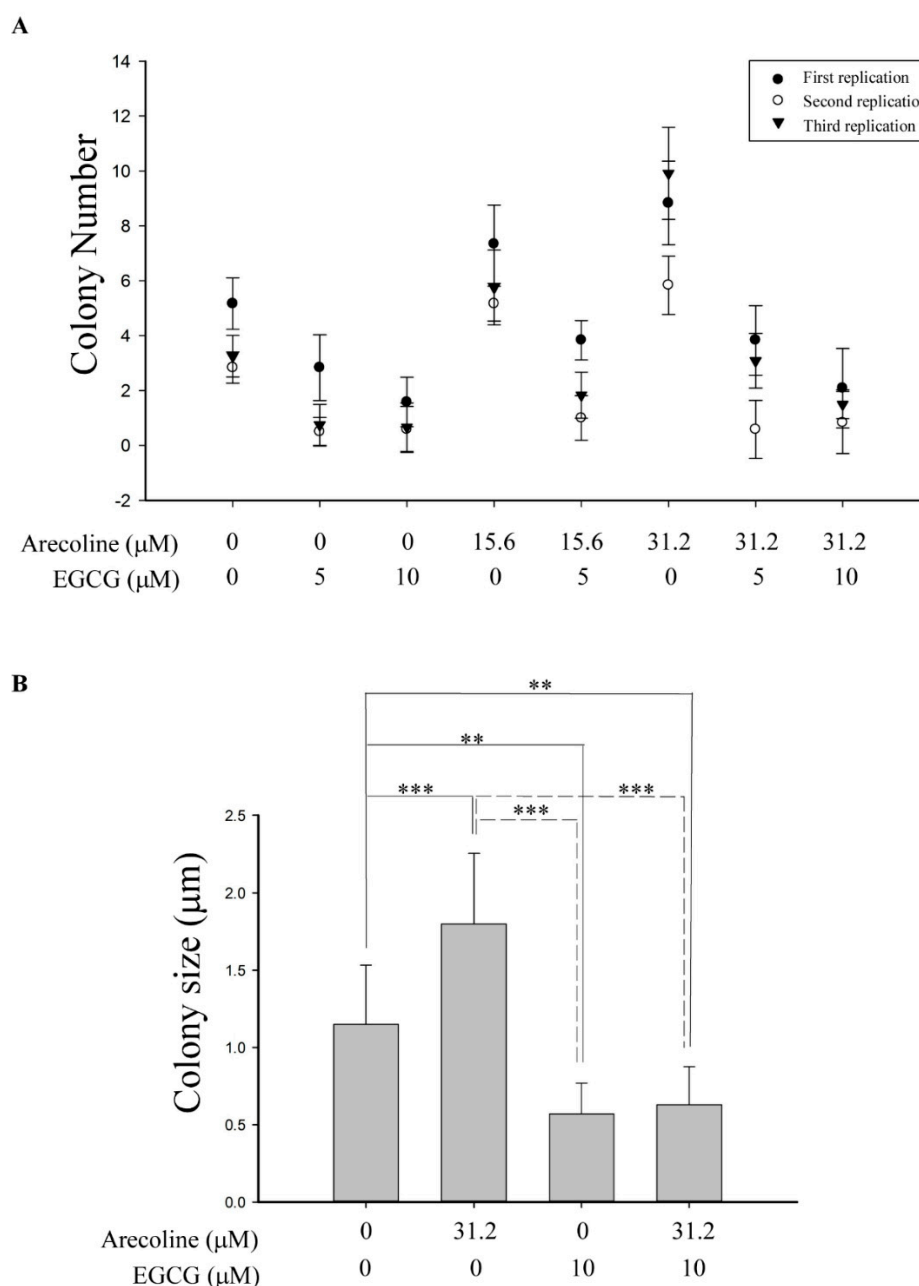

**Figure S1.** EGCG reduced the numbers and size of arecoline induced cell colonies. (A) Triple replications of colony formation assay of Figure 1D. Each group in single replication contained twelve repeat measurements. (B) Colony size of triple replications in Figure 1D. \*\*  $p < 0.01$ ; \*\*\*  $p < 0.001$ .

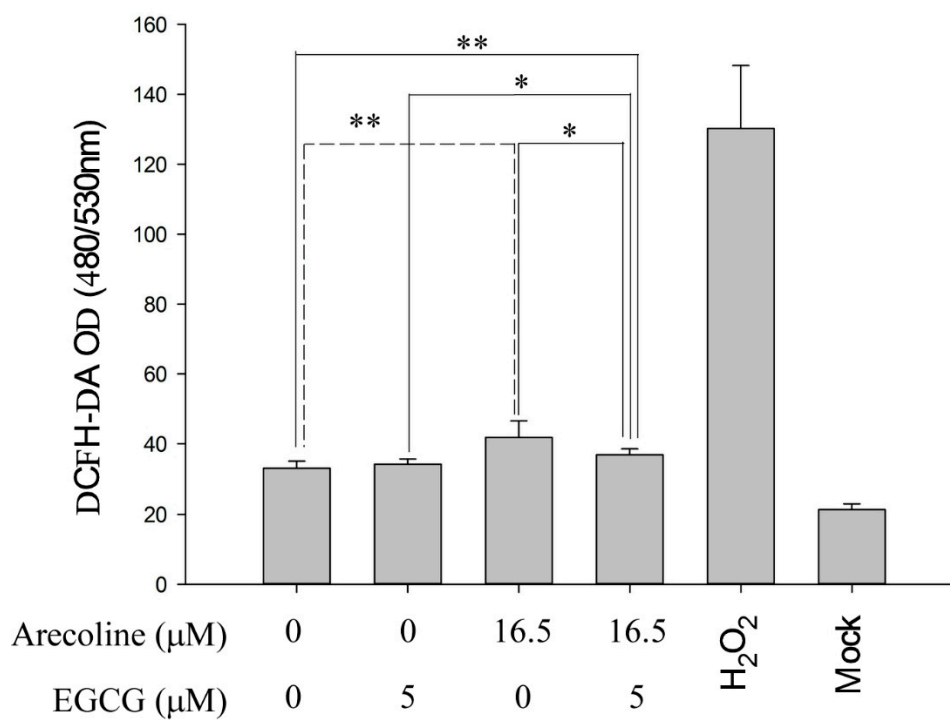

**Figure S2.** DCFH-DA intracellular ROS level quantification in OE21 after treating arecoline for 8 h. Each group contained six repeat measurements. \*  $p < 0.05$ ; \*\*  $p < 0.01$ .

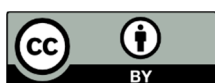

© 2019 by the authors. Licensee MDPI, Basel, Switzerland. This article is an open access article distributed under the terms and conditions of the Creative Commons Attribution (CC BY) license (<http://creativecommons.org/licenses/by/4.0/>).
